# Supplementary material for: First Identification of RNA-Binding Proteins That Regulate Alternative Exons in the Dystrophin Gene
Source: MDPI journal article supplement (doi:10.3390/ijms21207803), 2020-10-21
Supplement: s1 [file s1]

**Supplementary Table 1**

| Alternative Splicing Event (ASE) | C25Cl48 d3-diff (%) | skeletal muscle <sup>a</sup> (%) | predicted impact on the reading frame |
|----------------------------------|---------------------|----------------------------------|---------------------------------------|
| del E71                          | 37.32               | 1.80                             | in frame                              |
| del E78                          | 27.30               | 2.48                             | elongated C-term                      |
| PE1a                             | 12.69               | 3.06                             | out of frame                          |
| del E38                          | 4.93                | ND                               | In frame                              |
| del E37                          | 2.97                | 0                                | In frame                              |
| del E6-41                        | 2.18                | 0                                | in frame                              |
| 3'ss exon 54 (-3 nt)             | 1.75                | 1.12                             | in frame                              |
| del E9                           | 1.55                | 0.63                             | in frame                              |
| del E2                           | 1.01                | ND                               | out of frame                          |
| PE51X                            | 0.56                | 0.21                             | in frame                              |
| del E71-74                       | 0.42                | ND                               | in frame                              |
| del E39                          | 0.43                | ND                               | in frame                              |
| 3'ss exon 78 (-4 nt)             | 0.26                | 0.43                             | out of frame                          |
| del E17-44                       | 0.33                | 0                                | in frame                              |
| del E41                          | 0.38                | ND                               | in frame                              |
| del E73                          | 0.28                | 0.32                             | in frame                              |
| del E19-44                       | 0.27                | 0                                | in frame                              |
| del E56-78                       | 0.26                | 0                                | in frame                              |
| 3'ss exon 76 (-60 nt)            | 0.32                | 0.33                             | in frame                              |
| del E68                          | 0.25                | ND                               | out of frame                          |
| PE12X                            | 0.25                | 0                                | in frame                              |
| PE2a                             | 0.12                | ND                               | out of frame                          |
